# Supplementary material for: The genomic features that affect the lengths of 5’ untranslated regions in multicellular eukaryotes
Source: PubMed Central journal article supplement (PMC3283318; doi:10.1186/1471-2105-12-s9-s3), 2011-10-05
Supplement: 1471-2105-12-S9-S3-S1.pdf [file 1471-2105-12-S9-S3-S1.pdf]

**Additional file 1.** The variance inflation factors (VIFs) of each feature in the linear regression models for 5'UTR length prediction

| Predictors | human | mouse | rat  | chicken | frog | zebrafish | fruit fly | mosquito | sea squirt | nematode |
|------------|-------|-------|------|---------|------|-----------|-----------|----------|------------|----------|
| G+C %      | 1.81  | 1.85  | 1.56 | 1.97    | 1.09 | 1.13      | 1.08      | 1.03     | 1.06       | 1.07     |
| AUG OE     | 1.36  | 1.20  | 1.22 | 1.45    | 1.25 | 1.32      | 1.24      | 1.14     | 1.25       | 1.49     |
| UGA OE     | 1.39  | 1.25  | 1.26 | 1.43    | 1.30 | 1.41      | 1.22      | 1.16     | 1.32       | 1.50     |
| UAA OE     | 1.46  | 1.46  | 1.40 | 1.59    | 1.30 | 1.37      | 1.28      | 1.26     | 1.31       | 1.31     |
| UAG OE     | 1.84  | 1.82  | 1.76 | 2.05    | 1.61 | 1.48      | 1.43      | 1.45     | 1.47       | 1.43     |
| CG OE      | 2.22  | 2.20  | 1.81 | 2.08    | 1.25 | 1.27      | 1.17      | 1.16     | 1.26       | 1.21     |
| UG OE      | 2.12  | 1.89  | 1.89 | 2.06    | 1.90 | 2.08      | 1.67      | 1.59     | 1.98       | 2.06     |
| UU OE      | 1.28  | 1.29  | 1.27 | 1.40    | 1.39 | 1.33      | 1.29      | 1.31     | 1.63       | 1.28     |
| UA OE      | 2.28  | 2.19  | 2.10 | 2.43    | 2.02 | 2.06      | 1.86      | 1.80     | 1.92       | 1.81     |
