# Supplementary material for: The genomic features that affect the lengths of 5’ untranslated regions in multicellular eukaryotes
Source: PubMed Central journal article supplement (PMC3283318; doi:10.1186/1471-2105-12-s9-s3), 2011-10-05
Supplement: 1471-2105-12-S9-S3-S2.pdf [file 1471-2105-12-S9-S3-S2.pdf]

**Additional file 2.** Evaluation of the effect of uORF presence/absence on 5'UTR length. The presence/absence of uORF was added into the multiple regression model, and the statistical significance of the coefficient ( $\beta_{10}$ ) of this newly added variable ( $X_{10}$ ) was evaluated.

| Species                                     | Estimate of $\beta_{10}$ | t value | p value      |
|---------------------------------------------|--------------------------|---------|--------------|
| Human( <i>Homo sapiens</i> )                | 0.259                    | 39.176  | < 2e-16 ***  |
| Mouse( <i>Mus musculus</i> )                | 0.276                    | 41.105  | < 2e-16 ***  |
| Rat( <i>Rattus norvegicus</i> )             | 0.281                    | 31.794  | <2e-16 ***   |
| Frog( <i>Xenopus tropicalis</i> )           | 0.269                    | 33.064  | < 2e-16 ***  |
| Chicken( <i>Gallus gallus</i> )             | 0.234                    | 12.492  | < 2e-16 ***  |
| Zebrafish( <i>Danio rerio</i> )             | 0.250                    | 40.752  | < 2e-16 ***  |
| Mosquito( <i>Anopheles gambiae</i> )        | 0.243                    | 24.415  | < 2e-16 ***  |
| Fruit fly( <i>Drosophila melanogaster</i> ) | 0.324                    | 43.084  | < 2e-16 ***  |
| Seasquirt( <i>Ciona intestinalis</i> )      | 0.200                    | 6.956   | 1.33e-11 *** |
| Nematode( <i>Caenorhabditis elegans</i> )   | 0.300                    | 25.096  | <2e-16 ***   |

The regression model was:

$$Y = \beta_0 + \beta_1 * X_1 + \beta_2 * X_2 + \beta_3 * X_3 + \beta_4 * X_4 + \beta_5 * X_5 + \beta_6 * X_6 + \beta_7 * X_7 + \beta_8 * X_8 + \beta_9 * X_9 + \beta_{10} * X_{10} + \varepsilon$$

Y : Log<sub>10</sub>5'UTR length

X1 : GC content

X2 : AUG<sub>O/E</sub>

X3 : UGA<sub>O/E</sub>

X4 : UAA<sub>O/E</sub>

X5 : UAG<sub>O/E</sub>

X6 : CpG<sub>O/E</sub>

X7 : UpG<sub>O/E</sub>

X8 : UpU<sub>O/E</sub>

X9 : UpA<sub>O/E</sub>

X10 : uORF presence (1) / absence (0)
