# Supplementary material for: The genomic features that affect the lengths of 5’ untranslated regions in multicellular eukaryotes
Source: PubMed Central journal article supplement (PMC3283318; doi:10.1186/1471-2105-12-s9-s3), 2011-10-05

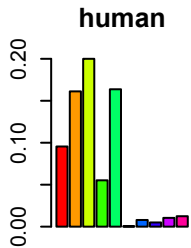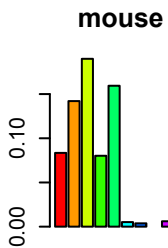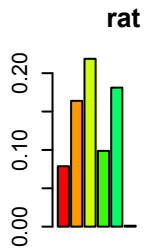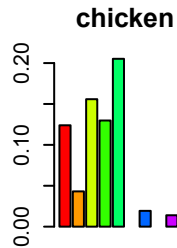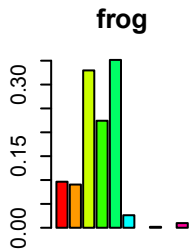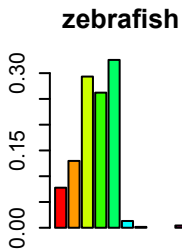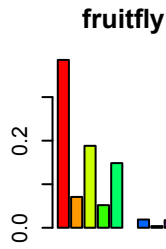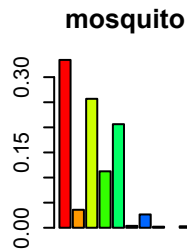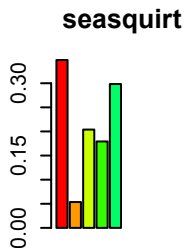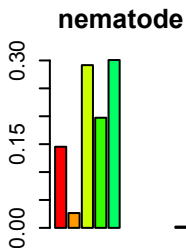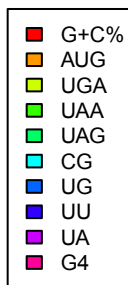

Supplement: 1471-2105-12-S9-S3-S3.pdf [file 1471-2105-12-S9-S3-S3.pdf]
