# Supplementary material for: The genomic features that affect the lengths of 5’ untranslated regions in multicellular eukaryotes
Source: PubMed Central journal article supplement (PMC3283318; doi:10.1186/1471-2105-12-s9-s3), 2011-10-05
Supplement: 1471-2105-12-S9-S3-S5.pdf [file 1471-2105-12-S9-S3-S5.pdf]

**Additional file 5.** The minimal length of a sequence for a specific trinucleotide to occur at least once in the ten analyzed organisms.

| species    | A%     | T%     | G%     | Min L (Bp)<br>AUG/UAG/UGA | Min L (Bp)<br>UAA |
|------------|--------|--------|--------|---------------------------|-------------------|
| human      | 19.21% | 19.06% | 31.29% | 87.3                      | 142.2             |
| mouse      | 19.66% | 19.65% | 30.73% | 84.2                      | 131.7             |
| rat        | 20.86% | 20.33% | 29.68% | 79.4                      | 113.0             |
| chicken    | 17.74% | 17.94% | 33.35% | 94.2                      | 177.1             |
| frog       | 25.01% | 23.74% | 26.77% | 62.9                      | 67.3              |
| zebrafish  | 27.90% | 26.57% | 23.32% | 57.8                      | 48.4              |
| fruit fly  | 31.51% | 24.86% | 21.43% | 59.6                      | 40.5              |
| mosquito   | 26.90% | 24.52% | 24.44% | 62.0                      | 56.4              |
| sea squirt | 32.90% | 30.91% | 19.21% | 51.2                      | 29.9              |
| nematode   | 30.77% | 29.94% | 17.84% | 60.8                      | 35.3              |

The trinucleotides analyzed in the study include AUG, UGA, UAG, and UAA. Note that the former three have the same nucleotide composition.
